# Supplementary material for: Identification of Genes Linking Natural Killer Cells to Apoptosis in Acute Myocardial Infarction and Ischemic Stroke
Source: Front Immunol. 2022 Apr 1;13:817377. doi: 10.3389/fimmu.2022.817377 (PMC9012496; doi:10.3389/fimmu.2022.817377)
Supplement: Supplementary file 12 [file Table_3.xls]

Modules	Top10 Hub genes
black	ADRBK1
	SEPN1
	INPPL1
	TTC7A
	CARM1
	CBFA2T3
	FAM65A
	TLE3
	IFT27
	CHMP1A
blue	LRRC40
	ESCO1
	MED23
	ZNF644
	GOLGA4
	SENP6
	HERC4
	UFL1
	UBR1
	SHPRH
brown	SIGLEC9
	ARHGEF11
	KIAA0513
	WAS
	SBNO2
	STXBP2
	NCSTN
	NFAM1
	SLC15A3
	ALDH3B1
greenyellow	CCDC124
	PCBD1
	MRPL4
	MPV17L2
	DDX41
	COPE
	PMF1
	BABAM1
	DOK2
	UBL7
green	PIEZO1
	PITPNM1
	BAHD1
	TRAF7
	TNFRSF14
	TCOF1
	VAMP2
	DAXX
	EDC4
	ARFGAP1
magenta	SLC41A1
	RASA3
	ZBTB4
	PIK3C2B
	PLCG1
	FAM102A
	P2RY8
	TCF7
	SNX3
	MAN1C1
pink	CFP
	SMARCD3
	NLRP12
	LILRB4
	CTSB
	TALDO1
	PLIN3
	EMILIN2
	LILRB3
	NCF4
purple	SAMD3
	PHLDB2
	FASLG
	ENPP5
	NCALD
	RGS9
	PPP2R2B
	PRSS23
	PDGFD
	CD247
red	PSMB6
	TSPO
	FAM96B
	ERP29
	LAMTOR4
	TIMM50
	SPAG7
	CDK5
	TMEM147
	NOL12
tan	CTBS
	UHRF1BP1L
	HOOK3
	LIME1
	FBXL5
	SH3GLB1
	BMP2K
	ENTPD1
	BNIP2
	PGM2
turquoise	BDP1
	SETDB2
	AGL
	CASP8AP2
	GLMN
	PIBF1
	FAM214A
	ZC3H8
	ATR
	SCAI
yellow	WDFY3
	PLBD1
	TLR8
	PRRG4
	ALOX5
	TLR5
	PLXDC2
	RNF24
	HAL
	SIRPD
